# Supplementary material for: Physical Therapist and Physical Therapist Student Knowledge, Confidence, Attitudes, and Beliefs About Providing Care for People With Dementia: A Mixed-Methods Systematic Review
Source: PubMed Central journal article supplement (PMC9155993; doi:10.1093/ptj/pzac010), 2022-02-12
Supplement: ptj-2021-0242_r2_supplementary_appendix_1_pzac010.pdf [file ptj-2021-0242_r2_supplementary_appendix_1_pzac010.pdf]

### Supplementary Appendix 1. Search strategy: MEDLINE (Ovid)

|                                                                                                                                                                            |
|----------------------------------------------------------------------------------------------------------------------------------------------------------------------------|
| 1. Physical Therapists/                                                                                                                                                    |
| 2. physiotherap*.mp.                                                                                                                                                       |
| 3. physical therap*.mp.                                                                                                                                                    |
| 4. dementia/ or exp alzheimer disease/ or exp aphasia, primary progressive/ or exp dementia, vascular/ or exp frontotemporal lobar degeneration/ or exp lewy body disease/ |
| 5. dementia.mp.                                                                                                                                                            |
| 6. alzheimer*.mp.                                                                                                                                                          |
| 7. Attitude/                                                                                                                                                               |
| 8. Qualitative Research/                                                                                                                                                   |
| 9. attitud*.mp.                                                                                                                                                            |
| 10. belief*.mp.                                                                                                                                                            |
| 11. confidence.mp.                                                                                                                                                         |
| 12. knowledg*.mp.                                                                                                                                                          |
| 13. opinion*.mp.                                                                                                                                                           |
| 14. experienc*.mp.                                                                                                                                                         |
| 15. reflect*.mp.                                                                                                                                                           |
| 16. educat*.mp.                                                                                                                                                            |
| 17. expertise.mp.                                                                                                                                                          |
| 18. value*.mp.                                                                                                                                                             |
| 19. perception*.mp.                                                                                                                                                        |
| 20. barrier*.mp.                                                                                                                                                           |
| 21. facilitat*                                                                                                                                                             |
| 22. 1 or 2 or 3                                                                                                                                                            |
| 23. 4 or 5 or 6                                                                                                                                                            |
| 24. 7 or 8 or 9 or 10 or 11 or 12 or 13 or 14 or 15 or 16 or 17 or 18 or 19 or 20 or 21                                                                                    |
| 25. 22 and 23 and 24                                                                                                                                                       |
